# Supplementary material
Source: HighWire-hosted journal article supplement (https://ijgc.bmj.com/highwire/filestream/28356/field_highwire_adjunct_files/3/ijgc-2022-004026supp004_data_supplement.pdf)
Supplement: ijgc-2022-004026supp004_data_supplement.pdf [file ijgc-2022-004026supp004_data_supplement.pdf]

# Supplemental Figure 4

## Interaction models for TTNT and OS.

Treatment interaction models for (A) TTNT and (B) OS are shown for MSI caller, and (C) TTNT and (D) OS for TMB10.

| (A) | <b>TTNT Model: MSI</b>         | <b>HR</b>        | <b>p-value</b> |
|-----|--------------------------------|------------------|----------------|
|     | Risk Score (per unit increase) | 1.46 (1.14-1.87) | 0.0025         |
|     | ICI vs. Chemo                  | 1.43 (0.59-3.48) | 0.4334         |
|     | MSI-H vs. MSS                  | 1.7 (1.22-2.39)  | 0.002          |
|     | Interaction: MSI-H on ICI      | 0.11 (0.03-0.42) | 0.0014         |

  

| (B) | <b>OS Model: MSI</b>           | <b>HR</b>        | <b>p-value</b> |
|-----|--------------------------------|------------------|----------------|
|     | Risk Score (per unit increase) | 1.41 (1.1-1.81)  | 0.0069         |
|     | ICI vs. Chemo                  | 1.65 (0.73-3.74) | 0.2264         |
|     | MSI-H vs. MSS                  | 1.3 (0.95-1.77)  | 0.1032         |
|     | Interaction: MSI-H on ICI      | 0.09 (0.02-0.37) | 9.00E-04       |

  

| (C) | <b>TTNT Model: TMB10</b>          | <b>HR</b>        | <b>p-value</b> |
|-----|-----------------------------------|------------------|----------------|
|     | Risk Score (per unit increase)    | 2.77 (2.13-3.61) | < 0.001        |
|     | ICI vs. Chemo                     | 1.86 (0.86-4.01) | 0.1154         |
|     | TMB $\geq$ 10 vs. TMB <10         | 1.22 (0.81-1.83) | 0.3398         |
|     | Interaction: TMB $\geq$ 10 on ICI | 0.15 (0.04-0.61) | 0.0084         |

  

| (D) | <b>OS Model: TMB10</b>            | <b>HR</b>        | <b>p-value</b> |
|-----|-----------------------------------|------------------|----------------|
|     | Risk Score (per unit increase)    | 2.71 (2.07-3.54) | < 0.001        |
|     | ICI vs. Chemo                     | 1.71 (0.83-3.52) | 0.1455         |
|     | TMB $\geq$ 10 vs. TMB <10         | 1.02 (0.69-1.5)  | 0.9337         |
|     | Interaction: TMB $\geq$ 10 on ICI | 0.14 (0.03-0.67) | 0.0144         |
